# Supplementary material for: Opposite photocatalytic activity orders of low-index facets of anatase TiO2 for liquid phase dye degradation and gaseous phase CO2 photoreduction
Source: Royal Society of Chemistry journal article supplement (doi:10.1039/c4cp01488j), 2014-01-01
Supplement: c4cp01488j1.pdf [file c4cp01488j1.pdf]

*Supporting Materials for:*

**Opposite photocatalytic activity order of low-index facets of anatase**

**TiO<sub>2</sub> for liquid phase dye degradation and gaseous phase CO<sub>2</sub>**

**photoreduction**

Liqun Ye,<sup>#a,b</sup> Jin Mao,<sup>#a</sup> Tianyou Peng<sup>\*a</sup> and Ling Zan<sup>\*a</sup>

a College of Chemistry and Molecular Science, Wuhan University, Wuhan 430072, People's Republic of China.

b College of Chemistry and Pharmaceutical Engineering, Nanyang Normal University, Nanyang 473061, People's Republic of China

E-mail: [irlab@whu.edu.cn](mailto:irlab@whu.edu.cn) (L. Zan)

[typeng@whu.edu.cn](mailto:typeng@whu.edu.cn) (T. Peng)

# The authors equally contributed.

**Photoactivity test of •OH generation**

The photocatalytic activity was evaluated with 300 W high pressure mercury lamp ( $\lambda = 365$  nm, Changzhou Yuyu Electro-Optical Device Co., Ltd. China) irradiation. The photocatalytic process is arranged with following way: 50 mL solution of terephthalic acid (TA) ( $5 \times 10^{-4}$  mol/L) and NaOH ( $2 \times 10^{-3}$  mol/L) mixed solution was transferred to a quartz glass beaker, and then 10 mg TiO<sub>2</sub> samples were added to the above beaker. Prior to irradiation, the suspensions can be get desorption-adsorption equilibrium with ultrasonic treatment for 10 min and then magnetically stirred in dark for 30 min. The suspensions were kept under constant air-equilibrated conditions with magnetic stirring during irradiation. At certain time intervals, 4 mL suspensions were centrifuged by centrifuge (TGL-16G, Shanghai Anting Scientific Instrument Factory, China) at 10000 rpm for 15 min to remove the TiO<sub>2</sub> nanoparticles. The upper clear liquid of TA was analyzed by recording the maximum PL peak (426 nm for TAOH) and PL spectra of dyes using a Shimadzu spectrofluorophotometer (RF-5301pc) with  $\lambda_{\text{exc}} = 315$  nm.

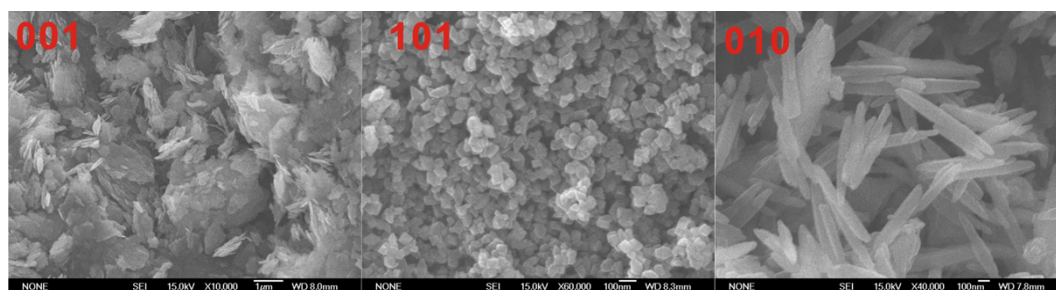

**Figure S1.** SEM images of the samples with different facets.

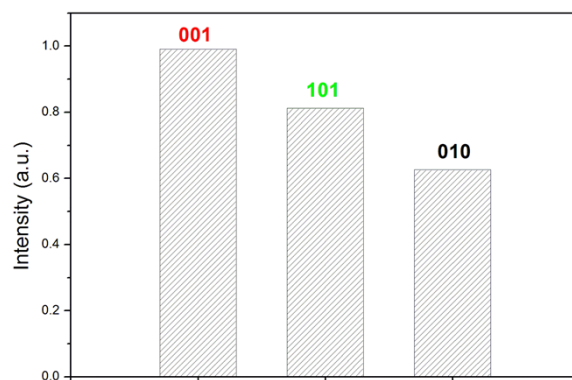

**Figure S2.** Photocatalytic orders upon for RhB normalization by the surface area.

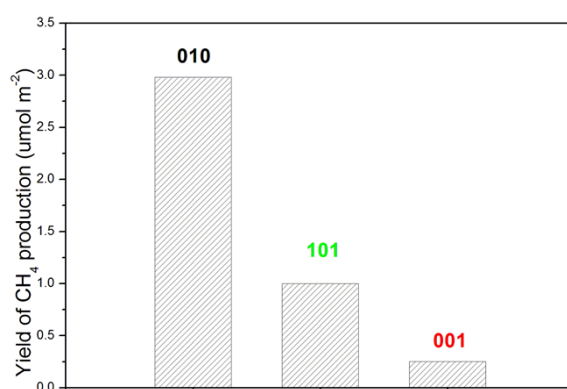

**Figure S3.** Photocatalytic orders upon for CO<sub>2</sub> photoreduction normalization by the surface area.

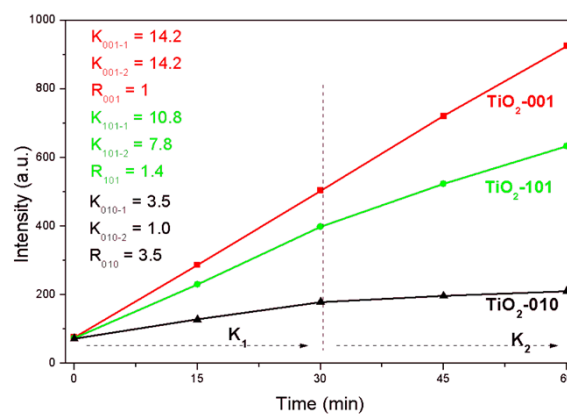

**Figure S4.** Photocatalytic activity of {101}, {001} and {010} single facets anatase TiO<sub>2</sub> for •OH generation activity

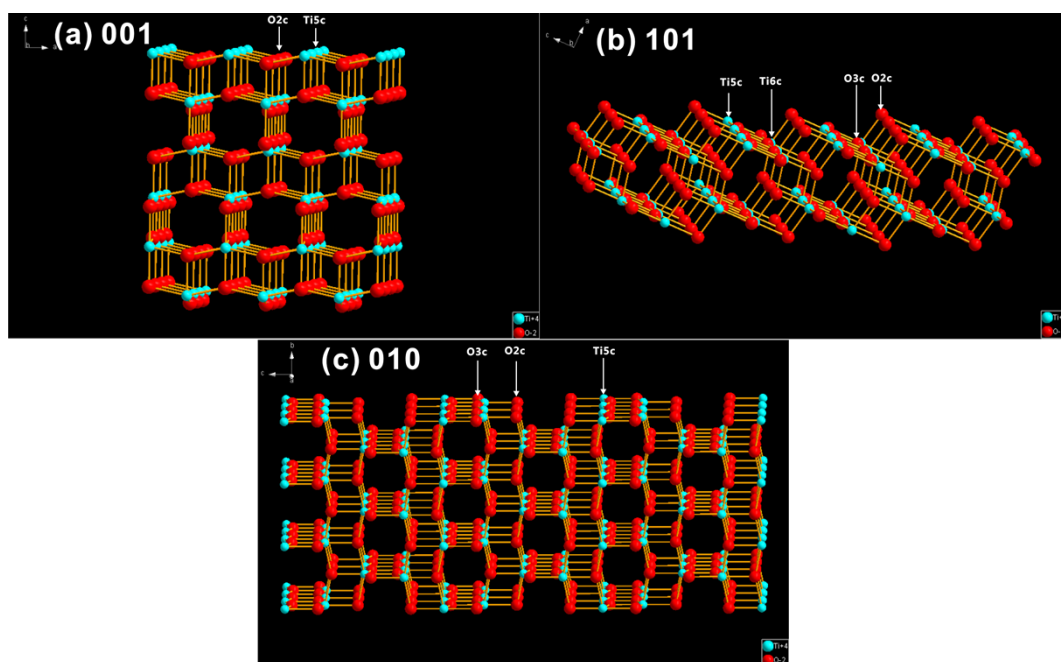

**Figure S5.** Surface atomic structure of  $\{001\}$ ,  $\{101\}$  and  $\{010\}$  facets.
